# Supplementary material for: Polymorphism within IGFBP Genes Affects the Acidity, Colour, and Shear Force of Rabbit Meat
Source: MDPI journal article supplement (doi:10.3390/ani13233743), 2023-12-04
Supplement: s1 [file s1]

Table S1. Associations between polymorphism g.3431insAC within IGFBP1 and growth and slaughter traits

| Traits <sup>3</sup> | TW <sup>1</sup> |                 |                 |      |                | NZWxFG |      |       |      |                | PW    |      |       |      |                | FG    |      |       |      |                |
|---------------------|-----------------|-----------------|-----------------|------|----------------|--------|------|-------|------|----------------|-------|------|-------|------|----------------|-------|------|-------|------|----------------|
|                     | GG              |                 | G/GAC           |      | <i>p-value</i> | GG     |      | G/GAC |      | <i>p-value</i> | GG    |      | G/GAC |      | <i>p-value</i> | GG    |      | G/GAC |      | <i>p-value</i> |
|                     | Means           | SD <sup>2</sup> | Means           | SD   |                | Means  | SD   | Means | SD   |                | Means | SD   | Means | SD   |                | Means | SD   | Means | SD   |                |
| BW12                | 2774            | 54 <sup>2</sup> | 2669            | 53   | 0.1976         | 2651   | 43   | 2660  | 42   | 0.4524         | 2841  | 46   | 2834  | 58   | 0.9734         | 3194  | 77   | 3504  | 181  | 0.1568         |
| SW                  | 2808            | 54              | 2705            | 51   | 0.2989         | 2699   | 50   | 2720  | 49   | 0.4600         | 2859  | 46   | 2710  | 65   | 0.5517         | 3281  | 82   | 3693  | 143  | 0.0713         |
| HCW                 | 1494            | 30              | 1439            | 29   | 0.1835         | 1389   | 26   | 1386  | 27   | 0.4975         | 1455  | 25   | 1398  | 34   | 0.5925         | 1657  | 49   | 1898  | 94   | 0.1329         |
| CCW                 | 1478            | 29              | 1380            | 28   | 0.1127         | 1341   | 25   | 1344  | 26   | 0.4965         | 1323  | 21   | 1364  | 29   | 0.7353         | 1591  | 49   | 1832  | 89   | 0.1559         |
| DPH                 | 53.21           | 0.27            | 53.19           | 0.34 | 0.1056         | 51.30  | 0.28 | 50.90 | 0.29 | 0.8073         | 50.87 | 0.25 | 51.57 | 0.40 | 0.9161         | 50.18 | 0.51 | 51.23 | 0.69 | 0.2818         |
| DPC                 | 51.59           | 0.26            | 51.25           | 0.30 | 0.1032         | 49.48  | 0.26 | 49.34 | 0.27 | 0.9881         | 48.15 | 0.29 | 49.26 | 0.54 | 0.7638         | 48.33 | 0.58 | 49.47 | 0.66 | 0.0820         |
| FMB                 | 585             | 10              | 558             | 10   | 0.1346         | 527    | 11   | 533   | 11   | 0.7021         | 590   | 11   | 543   | 15   | 0.4130         | 688   | 22   | 791   | 36   | 0.1822         |
| FF                  | 39              | 6               | 30              | 3    | 0.1975         | 9      | 1    | 11    | 1    | 0.4474         | 26    | 2    | 15    | 2    | 0.1146         | 15    | 2    | 19    | 2    | 0.1462         |
| IM                  | 250             | 7               | 230             | 6    | 0.2227         | 239    | 5    | 237   | 5    | 0.5925         | 229   | 4    | 224   | 9    | 0.6312         | 243   | 9    | 273   | 21   | 0.5890         |
| IB                  | 43 <sup>a</sup> | 2               | 36 <sup>b</sup> | 1    | 0.0025         | 42     | 1    | 42    | 1    | 0.5479         | 35    | 1    | 42    | 1    | 0.2810         | 45    | 2    | 50    | 4    | 0.4808         |
| IF                  | 28              | 3               | 26              | 2    | 0.2248         | 15     | 1    | 13    | 1    | 0.2402         | 25    | 2    | 20    | 2    | 0.4696         | 13    | 2    | 19    | 4    | 0.4629         |
| HM                  | 410             | 7               | 383             | 7    | 0.2311         | 395    | 7    | 394   | 8    | 0.5151         | 397   | 6    | 372   | 8    | 0.4903         | 441   | 14   | 516   | 28   | 0.0912         |
| HB                  | 119             | 3               | 114             | 3    | 0.8633         | 106    | 2    | 109   | 2    | 0.5437         | 117   | 2    | 113   | 3    | 0.5177         | 144   | 4    | 161   | 6    | 0.1281         |
| HF                  | 4               | 1               | 4               | 1    | 0.2362         | 5      | 1    | 4     | 0    | 0.5994         | 2     | 0    | 2     | 1    | 0.5578         | 2     | 1    | 3     | 1    | 0.2968         |

<sup>1</sup>TW – Termond White; NZWxFG – crossbreeds of New Zealand White and Flemish Giant; PW – Popielno White; FG – Flemish Giant. <sup>2</sup>SD – standard deviation. <sup>3</sup>BW12 – body weight at 12th week of age(g); SW- Slaughter weight (g); HCW – hot carcass weight (g); FP – fore part weight (g); IP – intermediate part (loin) weight (g); HP – hind part weight (g); CCW – chilled carcass weight (g); DPH – warm dressing out percentage (%); DPC – cold dressing out percentage (%); FMB – meat and bones in fore part (g); FF – dissectible fat in fore part (g); IM – meat in intermediate part (g); IB – bones in intermediate part (g); IF – dissectible fat in intermediate part (g); HM – meat in hind part (g); HB – bones in hind part (g); HF – dissectible fat in hind part(g). <sup>a,b</sup> Values within a row and breeds with different superscripts differ significantly at  $P < 0.003$

Table S2. Associations between polymorphism g.3431insAC within IGFBP1 and carcass traits

| Traits                         | TW <sup>1</sup> |                 |       |      | <i>p</i> -value | NZWxFG |      |       |      | <i>p</i> -value | PW    |      |       |      | <i>p</i> -value | FG                      |             |                          |             | <i>p</i> -value |
|--------------------------------|-----------------|-----------------|-------|------|-----------------|--------|------|-------|------|-----------------|-------|------|-------|------|-----------------|-------------------------|-------------|--------------------------|-------------|-----------------|
|                                | GG              |                 | G/GAC |      |                 | GG     |      | G/GAC |      |                 | GG    |      | G/GAC |      |                 | GG                      |             | G/GAC                    |             |                 |
|                                | Means           | SD <sup>2</sup> | Means | SD   |                 | Means  | SD   | Means | SD   |                 | Means | SD   | Means | SD   |                 | Means                   | SD          | Means                    | SD          |                 |
|                                |                 |                 |       |      |                 |        |      |       |      |                 |       |      |       |      |                 |                         |             |                          |             |                 |
| pH <sub>45</sub>               | 6.57            | 0.06            | 6.75  | 0.06 | 0.2081          | 6.63   | 0.03 | 6.67  | 0.03 | 0.5836          | 6.67  | 0.04 | 6.83  | 0.08 | 0.3895          | 6.64                    | 0.06        | 6.80                     | 0.11        | 0.1020          |
| L* <sub>45</sub>               | 52.49           | 0.49            | 52.46 | 0.47 | 0.0176          | 57.08  | 0.23 | 57.47 | 0.22 | 0.0583          | 50.72 | 0.37 | 52.00 | 1.25 | 0.2858          | 51.97                   | 0.54        | 54.96                    | 1.00        | 0.0046          |
| a* <sub>45</sub>               | 3.07            | 0.13            | 3.83  | 0.23 | 0.5360          | 11.45  | 0.15 | 11.13 | 0.15 | 0.0193          | 2.92  | 0.16 | 3.05  | 0.24 | 0.8723          | 3.65                    | 0.24        | 2.98                     | 0.37        | 0.4592          |
| b* <sub>45</sub>               | 1.01            | 0.29            | 1.10  | 0.29 | 0.0887          | 0.99   | 0.14 | 1.04  | 0.14 | 0.2184          | 0.45  | 0.24 | 0.57  | 0.43 | 0.9651          | <b>1.14<sup>a</sup></b> | <b>0.23</b> | <b>-0.50<sup>b</sup></b> | <b>0.63</b> | <b>0.0001</b>   |
| pH <sub>24</sub>               | 5.85            | 0.03            | 6.11  | 0.06 | 0.0054          | 5.79   | 0.02 | 5.71  | 0.02 | 0.0299          | 5.98  | 0.03 | 5.92  | 0.08 | 0.9774          | 6.07                    | 0.02        | 6.08                     | 0.05        | 0.2115          |
| L* <sub>24</sub>               | 55.36           | 0.44            | 55.20 | 0.37 | 0.9404          | 57.99  | 0.20 | 57.92 | 0.20 | 0.0259          | 56.24 | 0.27 | 54.34 | 0.69 | 0.1652          | 57.31                   | 0.48        | 59.33                    | 1.43        | 0.4196          |
| a* <sub>24</sub>               | 4.18            | 0.24            | 4.84  | 0.32 | 0.1504          | 12.59  | 0.18 | 12.56 | 0.17 | 0.2202          | 3.95  | 0.19 | 4.02  | 0.32 | 0.8211          | 4.74                    | 0.35        | 3.40                     | 0.26        | 0.0619          |
| b* <sub>24</sub>               | 4.21            | 0.32            | 4.29  | 0.27 | 0.6705          | 3.55   | 0.16 | 3.34  | 0.15 | 0.5575          | 4.08  | 0.17 | 3.91  | 0.24 | 0.7067          | 4.78                    | 0.29        | 3.82                     | 0.29        | 0.5678          |
| <i>m. longissimus lumborum</i> |                 |                 |       |      |                 |        |      |       |      |                 |       |      |       |      |                 |                         |             |                          |             |                 |
| pH <sub>45</sub>               | 6.71            | 0.05            | 6.47  | 0.19 | 0.6576          | 6.70   | 0.03 | 6.76  | 0.03 | 0.4414          | 6.66  | 0.06 | 6.48  | 0.10 | 0.4007          | 6.78                    | 0.05        | 6.97                     | 0.07        | 0.1030          |
| L* <sub>45</sub>               | 59.77           | 0.70            | 58.94 | 0.55 | 0.5776          | 60.65  | 0.32 | 60.65 | 0.31 | 0.2054          | 59.43 | 0.64 | 60.24 | 2.23 | 0.2358          | 62.27                   | 0.82        | 65.40                    | 1.39        | 0.0811          |
| a* <sub>45</sub>               | 0.70            | 0.40            | 1.27  | 0.38 | 0.2488          | 8.38   | 0.21 | 8.60  | 0.18 | 0.1599          | 1.55  | 0.41 | 0.13  | 0.86 | 0.2098          | 2.39                    | 0.66        | 0.37                     | 0.57        | 0.0865          |
| b* <sub>45</sub>               | -2.34           | 0.73            | -2.30 | 0.50 | 0.6848          | -2.59  | 0.15 | -2.26 | 0.17 | 0.3623          | -1.78 | 0.49 | -2.57 | 0.20 | 0.3635          | -1.89                   | 0.80        | -1.63                    | 0.87        | 0.5482          |
| pH <sub>24</sub>               | 5.76            | 0.04            | 5.92  | 0.04 | 0.1439          | 5.63   | 0.02 | 5.58  | 0.02 | 0.0306          | 5.81  | 0.03 | 5.84  | 0.08 | 0.5621          | 6.03                    | 0.05        | 6.06                     | 0.08        | 0.2824          |
| L* <sub>24</sub>               | 55.91           | 0.47            | 55.67 | 0.44 | 0.1647          | 56.99  | 0.27 | 56.39 | 0.26 | 0.1164          | 56.56 | 0.31 | 53.80 | 0.60 | 0.0086          | 58.76                   | 0.62        | 60.92                    | 1.77        | 0.6551          |
| a* <sub>24</sub>               | 5.21            | 0.27            | 6.43  | 0.40 | 0.0368          | 12.86  | 0.24 | 13.12 | 0.20 | 0.2042          | 5.43  | 0.25 | 6.00  | 0.85 | 0.2021          | 7.88                    | 0.40        | 7.01                     | 0.61        | 0.4481          |
| b* <sub>24</sub>               | 3.85            | 0.38            | 4.46  | 0.34 | 0.2235          | 1.96   | 0.20 | 1.77  | 0.19 | 0.4057          | 3.33  | 0.23 | 4.73  | 0.23 | 0.1434          | 5.76                    | 0.42        | 4.95                     | 0.75        | 0.6242          |
| <i>m. longissimus lumborum</i> |                 |                 |       |      |                 |        |      |       |      |                 |       |      |       |      |                 |                         |             |                          |             |                 |
| Shear force                    | 2.03            | 0.09            | 1.93  | 0.12 | 0.4335          | 3.79   | 0.12 | 3.98  | 0.13 | 0.2512          | 1.74  | 0.07 | 2.15  | 0.32 | 0.0035          | 2.07                    | 0.10        | 2.43                     | 0.20        | 0.0926          |
| Hardness                       | 13.57           | 0.71            | 13.69 | 0.45 | 0.0542          | 57.86  | 1.96 | 59.09 | 2.02 | 0.9284          | 10.76 | 0.39 | 12.87 | 1.04 | 0.1067          | 11.71                   | 0.68        | 13.23                    | 0.94        | 0.6067          |
| Springiness                    | 0.45            | 0.01            | 0.47  | 0.01 | 0.5183          | 0.52   | 0.01 | 0.52  | 0.01 | 0.8015          | 0.47  | 0.01 | 0.45  | 0.02 | 0.1873          | 0.49                    | 0.01        | 0.49                     | 0.01        | 0.6896          |
| Cohesivness                    | 0.44            | 0.01            | 0.43  | 0.01 | 0.0357          | 0.42   | 0.01 | 0.41  | 0.01 | 0.0616          | 0.43  | 0.00 | 0.43  | 0.01 | 0.9498          | 0.45                    | 0.01        | 0.44                     | 0.01        | 0.3880          |
| Cheviness                      | 2.74            | 0.19            | 2.81  | 0.14 | 0.1238          | 13.37  | 0.49 | 13.78 | 0.57 | 0.7719          | 2.25  | 0.11 | 2.55  | 0.28 | 0.4311          | 2.75                    | 0.24        | 2.95                     | 0.32        | 0.9609          |

<sup>1</sup>TW – Termond White; NZWxFG – crossbreeds of New Zealand White and Flemish Giant; PW – Popielno White; FG – Flemish Giant. <sup>2</sup>SD – standard deviation. <sup>a,b</sup>Values within a row and breeds

with different superscripts differ significantly at  $P < 0.003$

Table S3. Associations between polymorphism g.41594308T>C within IGFBP4 and growth and slaughter traits

| Traits <sup>3</sup> | TW <sup>1</sup> |                 |       |      |         | NZWxFG |      |       |      |         | PW                      |           |                         |           |               | FG    |      |       |      |         |
|---------------------|-----------------|-----------------|-------|------|---------|--------|------|-------|------|---------|-------------------------|-----------|-------------------------|-----------|---------------|-------|------|-------|------|---------|
|                     | TT              |                 | TC    |      | p-value | TT     |      | TC    |      | p-value | TT                      |           | TC                      |           | p-value       | TT    |      | TC    |      | p-value |
|                     | Means           | SD <sup>2</sup> | Means | SD   |         | Means  | SD   | Means | SD   |         | Means                   | SD        | Means                   | SD        |               | Means | SD   | Means | SD   |         |
| BW12                | 2778            | 73              | 2687  | 45   | 0.5254  | 2683   | 48   | 2647  | 43   | 0.8122  | 2965                    | 49        | 2729                    | 55        | 0.0502        | 3264  | 115  | 3391  | 127  | 0.5195  |
| SW                  | 2802            | 68              | 2740  | 45   | 0.6139  | 2761   | 55   | 2667  | 53   | 0.4814  | 2962                    | 53        | 2658                    | 56        | 0.0069        | 3337  | 138  | 3449  | 140  | 0.6118  |
| HCW                 | 1498            | 39              | 1456  | 24   | 0.6225  | 1420   | 30   | 1357  | 28   | 0.2894  | <b>1512<sup>a</sup></b> | <b>26</b> | <b>1322<sup>b</sup></b> | <b>33</b> | <b>0.0028</b> | 1657  | 79   | 1791  | 86   | 0.3085  |
| CCW                 | 1461            | 38              | 1410  | 24   | 0.5953  | 1371   | 29   | 1314  | 28   | 0.3638  | 1351                    | 13        | 129                     | 11        | 0.1749        | 1620  | 74   | 1694  | 86   | 0.8509  |
| DPH                 | 53.43           | 0.36            | 53.15 | 0.25 | 0.9139  | 51.41  | 0.35 | 50.85 | 0.30 | 0.2074  | 51.07                   | 0.27      | 49.70                   | 0.38      | 0.0836        | 49.53 | 0.86 | 51.15 | 0.55 | 0.7999  |
| DPC                 | 51.63           | 0.35            | 51.38 | 0.23 | 0.7826  | 49.61  | 0.33 | 49.20 | 0.29 | 0.4337  | 47.95                   | 0.40      | 48.35                   | 0.34      | 0.3876        | 48.52 | 1.11 | 48.87 | 0.67 | 0.3453  |
| FMB                 | 577             | 14              | 566   | 8    | 0.7287  | 538    | 12   | 521   | 12   | 0.5263  | 605                     | 13        | 510                     | 14        | 0.0040        | 692   | 34   | 737   | 35   | 0.7002  |
| FF                  | 39              | 6               | 30    | 3    | 0.4576  | 10     | 1    | 10    | 1    | 0.6131  | 26                      | 3         | 19                      | 3         | 0.1669        | 14    | 4    | 12    | 2    | 0.5295  |
| IM                  | 247             | 7               | 237   | 6    | 0.7872  | 242    | 6    | 233   | 5    | 0.5441  | 231                     | 5         | 211                     | 6         | 0.1735        | 244   | 14   | 260   | 16   | 0.9438  |
| IB                  | 40              | 2               | 38    | 1    | 0.5799  | 42     | 1    | 40    | 1    | 0.3052  | 35                      | 1         | 30                      | 2         | 0.7913        | 49    | 3    | 47    | 3    | 0.6691  |
| IF                  | 28              | 3               | 26    | 2    | 0.1514  | 14     | 1    | 14    | 1    | 0.7552  | 27                      | 2         | 14                      | 2         | 0.0641        | 13    | 4    | 14    | 3    | 0.4121  |
| HM                  | 405             | 10              | 394   | 6    | 0.7640  | 402    | 9    | 386   | 8    | 0.4039  | 401                     | 7         | 357                     | 8         | 0.0106        | 460   | 21   | 473   | 26   | 0.9819  |
| HB                  | 122             | 3               | 116   | 3    | 0.6260  | 107    | 3    | 106   | 2    | 0.8556  | 118                     | 2         | 105                     | 2         | 0.0072        | 146   | 5    | 149   | 6    | 0.6803  |
| HF                  | 3               | 1               | 3     | 1    | 0.1959  | 4      | 1    | 5     | 1    | 0.3426  | 3                       | 1         | 1                       | 0         | 0.3743        | 2     | 1    | 1     | 1    | 0.8750  |

<sup>1</sup>TW – Termond White; NZWxFG – crossbreeds of New Zealand White and Flemish Giant; PW – Popielno White; FG – Flemish Giant. <sup>2</sup>SD – standard deviation. <sup>3</sup>BW12 – body weight at 12th week of age(g);SW- Slaughter weight (g); HCW – hot carcass weight (g); CCW – chilled carcass weight (g); DPH – warm dressing out percentage (%); DPC – cold dressing out percentage (%); FMB– meat and bones in fore part (g); FF - dissectible fat in fore part (g); IM - meat in intermediate part (g); IB - bones in intermediate part (g); IF - dissectible fat in intermediate part (g); HM - meat in hind part (g); HB - bones in hind part (g); HF - dissectible fat in hind part(g). <sup>a,b</sup>Values within a row and breeds with different superscripts differ significantly at  $P<0.003$

Table S4. Associations between polymorphism g.41594308T&gt;C within IGFBP4 and carcass traits

| Traits                         | TW <sup>1</sup> |                 |           |      | <i>p</i> -value | NZWxFG                  |             |                         |             | <i>p</i> -value | PW        |      |       |      | <i>p</i> -value | FG    |      |           |      | <i>p</i> -value |
|--------------------------------|-----------------|-----------------|-----------|------|-----------------|-------------------------|-------------|-------------------------|-------------|-----------------|-----------|------|-------|------|-----------------|-------|------|-----------|------|-----------------|
|                                | TT              |                 | TC        |      |                 | TT                      |             | TC                      |             |                 | TT        |      | TC    |      |                 | TT    |      | TC        |      |                 |
|                                | Means           | SD <sup>2</sup> | Mea<br>ns | SD   |                 | Means                   | SD          | Means                   | SD          |                 | Mea<br>ns | SD   | Means | SD   |                 | Means | SD   | Mean<br>s | SD   |                 |
| <i>m. biceps femoris</i>       |                 |                 |           |      |                 |                         |             |                         |             |                 |           |      |       |      |                 |       |      |           |      |                 |
| pH <sub>45</sub>               | 6.59            | 0.06            | 6.63      | 0.06 | 0.4806          | 6.72                    | 0.03        | 6.65                    | 0.03        | 0.0472          | 6.73      | 0.05 | 6.59  | 0.11 | 0.8694          | 6.71  | 0.12 | 6.69      | 0.08 | 0.9006          |
| L* <sub>45</sub>               | 52.80           | 0.43            | 53.03     | 0.50 | 0.8326          | 57.40                   | 0.25        | 57.10                   | 0.22        | 0.5733          | 50.94     | 0.55 | 49.79 | 0.55 | 0.9744          | 53.78 | 1.17 | 52.52     | 0.63 | 0.1206          |
| a* <sub>45</sub>               | 3.01            | 0.25            | 3.51      | 0.22 | 0.8844          | 11.11                   | 0.17        | 11.41                   | 0.15        | 0.4600          | 2.89      | 0.21 | 3.48  | 0.15 | 0.2555          | 3.37  | 0.42 | 3.38      | 0.38 | 0.5392          |
| b* <sub>45</sub>               | 0.87            | 0.35            | 0.96      | 0.23 | 0.5449          | 0.95                    | 0.17        | 1.14                    | 0.15        | 0.4355          | 0.05      | 0.27 | 1.26  | 0.30 | 0.9246          | 0.00  | 0.57 | 0.94      | 0.18 | 0.2187          |
| pH <sub>24</sub>               | 5.86            | 0.03            | 6.00      | 0.06 | 0.3424          | 5.80                    | 0.02        | 5.76                    | 0.02        | 0.0054          | 5.94      | 0.04 | 6.08  | 0.05 | 0.9288          | 6.20  | 0.03 | 6.05      | 0.02 | 0.0116          |
| L* <sub>24</sub>               | 56.16           | 0.38            | 55.18     | 0.38 | 0.1693          | 58.31                   | 0.20        | 57.58                   | 0.23        | 0.1212          | 56.29     | 0.44 | 56.16 | 0.41 | 0.8725          | 56.75 | 0.70 | 57.42     | 0.81 | 0.7616          |
| a* <sub>24</sub>               | 5.41            | 0.30            | 4.54      | 0.30 | 0.6195          | 12.25                   | 0.20        | 12.81                   | 0.18        | 0.1976          | 3.83      | 0.24 | 4.57  | 0.29 | 0.4190          | 4.03  | 0.40 | 4.59      | 0.49 | 0.7939          |
| b* <sub>24</sub>               | 4.20            | 0.28            | 4.35      | 0.26 | 0.3641          | 3.43                    | 0.18        | 3.65                    | 0.14        | 0.3025          | 3.88      | 0.22 | 4.81  | 0.27 | 0.1862          | 4.16  | 0.42 | 4.76      | 0.44 | 0.1035          |
| <i>m. longissimus lumborum</i> |                 |                 |           |      |                 |                         |             |                         |             |                 |           |      |       |      |                 |       |      |           |      |                 |
| pH <sub>45</sub>               | 6.70            | 0.07            | 6.51      | 0.16 | 0.7121          | 6.79                    | 0.03        | 6.74                    | 0.03        | 0.0280          | 6.67      | 0.07 | 6.44  | 0.13 | 0.5960          | 6.80  | 0.12 | 6.90      | 0.05 | 0.9511          |
| L* <sub>45</sub>               | 60.34           | 0.73            | 59.12     | 0.50 | 0.4806          | 60.84                   | 0.35        | 60.31                   | 0.33        | 0.5805          | 59.26     | 0.89 | 60.33 | 1.44 | 0.9448          | 62.32 | 1.55 | 63.52     | 1.48 | 0.0760          |
| a* <sub>45</sub>               | 0.51            | 0.40            | 1.30      | 0.41 | 0.7207          | 8.44                    | 0.22        | 8.70                    | 0.20        | 0.8104          | 1.81      | 0.53 | 1.27  | 0.87 | 0.7430          | 3.03  | 1.47 | 1.65      | 0.75 | 0.0157          |
| b* <sub>45</sub>               | -2.54           | 0.66            | -2.08     | 0.52 | 0.3317          | -2.33                   | 0.16        | -2.22                   | 0.18        | 0.0584          | -1.20     | 0.71 | -2.90 | 0.75 | 0.8840          | -0.39 | 1.21 | -0.67     | 0.50 | 0.0877          |
| pH <sub>24</sub>               | 5.75            | 0.03            | 5.83      | 0.04 | 0.5787          | <b>5.66<sup>a</sup></b> | <b>0.02</b> | <b>5.60<sup>b</sup></b> | <b>0.02</b> | <b>0.0011</b>   | 5.84      | 0.04 | 5.82  | 0.05 | 0.1901          | 5.98  | 0.07 | 5.89      | 0.06 | 0.7830          |
| L* <sub>24</sub>               | 55.11           | 0.40            | 55.44     | 0.41 | 0.4567          | 56.77                   | 0.30        | 56.41                   | 0.31        | 0.6235          | 56.88     | 0.48 | 55.98 | 0.67 | 0.3897          | 58.34 | 0.57 | 58.61     | 1.12 | 0.6886          |
| a* <sub>24</sub>               | 4.34            | 0.22            | 6.17      | 0.41 | 0.8168          | 13.11                   | 0.26        | 13.21                   | 0.21        | 0.8336          | 5.15      | 0.33 | 6.42  | 0.34 | 0.7915          | 7.04  | 0.65 | 8.01      | 0.45 | 0.7032          |
| b* <sub>24</sub>               | 3.96            | 0.35            | 4.05      | 0.34 | 0.3867          | 2.26                    | 0.24        | 1.92                    | 0.17        | 0.2691          | 3.40      | 0.32 | 3.38  | 0.35 | 0.9468          | 5.68  | 0.53 | 6.09      | 0.54 | 0.5245          |
| <i>m. longissimus lumborum</i> |                 |                 |           |      |                 |                         |             |                         |             |                 |           |      |       |      |                 |       |      |           |      |                 |
| Shear force                    | 2.00            | 0.12            | 1.93      | 0.08 | 0.2281          | 4.13                    | 0.15        | 3.72                    | 0.13        | 0.0203          | 1.79      | 0.11 | 1.88  | 0.15 | 0.5904          | 2.24  | 0.17 | 2.02      | 0.14 | 0.4585          |
| Hardness                       | 12.26           | 0.54            | 13.67     | 0.53 | 0.6510          | 59.75                   | 2.07        | 58.75                   | 2.10        | 0.4675          | 10.87     | 0.50 | 11.05 | 0.80 | 0.5150          | 12.88 | 0.71 | 11.98     | 1.09 | 0.1547          |
| Springiness                    | 0.45            | 0.01            | 0.46      | 0.01 | 0.4438          | 0.52                    | 0.01        | 0.52                    | 0.01        | 0.5127          | 0.48      | 0.01 | 0.46  | 0.01 | 0.4360          | 0.49  | 0.01 | 0.49      | 0.02 | 0.1300          |
| Cohesivness                    | 0.42            | 0.00            | 0.43      | 0.00 | 0.9725          | 0.42                    | 0.01        | 0.43                    | 0.01        | 0.0063          | 0.43      | 0.01 | 0.43  | 0.01 | 0.4146          | 0.47  | 0.01 | 0.44      | 0.01 | 0.0428          |
| Cheviness                      | 2.36            | 0.13            | 2.84      | 0.16 | 0.6360          | 13.97                   | 0.60        | 13.62                   | 0.59        | 0.5404          | 2.29      | 0.13 | 2.23  | 0.23 | 0.4408          | 3.02  | 0.27 | 2.70      | 0.37 | 0.0988          |

<sup>1</sup>TW – Termond White; NZWxFG – crossbreeds of New Zealand White and Flemish Giant; PW – Popielno White; FG – Flemish Giant. <sup>2</sup>SD – standard deviation. <sup>a,b</sup>Values within a row and breeds with different superscripts differ significantly at  $P < 0.003$

Table S5. Associations between polymorphism g.41592248A>C within *IGFBP4* and growth and slaughter traits

| Traits <sup>3</sup> | TW <sup>1</sup> |                 |       |      | <i>p-value</i> | NZW×FG |      |       |      | <i>p-value</i> | PW    |      |       |      | <i>p-value</i> | FG    |      |
|---------------------|-----------------|-----------------|-------|------|----------------|--------|------|-------|------|----------------|-------|------|-------|------|----------------|-------|------|
|                     | AA              |                 | AC    |      |                | AA     |      | AC    |      |                | AA    |      | AC    |      |                | AA    |      |
|                     | Means           | SD <sup>2</sup> | Means | SD   |                | Means  | SD   | Means | SD   |                | Means | SD   | Means | SD   |                | Means | SD   |
| BW12                | 2607            | 41              | 2750  | 48   | 0.3930         | 2689   | 47   | 2648  | 35   | 0.8570         | 2889  | 41   | 2720  | 106  | 0.0995         | 3248  | 70   |
| SW                  | 2640            | 43              | 2796  | 45   | 0.4868         | 2727   | 56   | 2692  | 41   | 0.7450         | 2910  | 42   | 2703  | 103  | 0.0648         | 3348  | 72   |
| HCW                 | 1395            | 24              | 1489  | 25   | 0.5630         | 1393   | 31   | 1377  | 22   | 0.6755         | 1479  | 23   | 1400  | 60   | 0.1429         | 1699  | 44   |
| CCW                 | 1346            | 24              | 1454  | 25   | 0.4575         | 1346   | 30   | 1334  | 21   | 0.6972         | 1354  | 18   | 1269  | 49   | 0.7504         | 1637  | 42   |
| DPH                 | 52.85           | 0.33            | 53.25 | 0.26 | 0.648          | 51.01  | 0.32 | 51.01 | 0.24 | 0.8721         | 50.78 | 0.24 | 51.73 | 0.41 | 0.4044         | 50.44 | 0.40 |
| DPC                 | 50.97           | 0.31            | 51.47 | 0.25 | 0.7707         | 49.30  | 0.33 | 49.38 | 0.22 | 0.8618         | 47.99 | 0.28 | 49.75 | 0.27 | 0.3468         | 48.77 | 0.46 |
| FMB                 | 545             | 9               | 577   | 9    | 0.5619         | 529    | 13   | 526   | 9    | 0.8689         | 601   | 10   | 546   | 25   | 0.0414         | 709   | 18   |
| FF                  | 23              | 3               | 38    | 4    | 0.3019         | 10     | 1    | 10    | 1    | 0.8911         | 26    | 2    | 21    | 2    | 0.5501         | 15    | 2    |
| IM                  | 224             | 5               | 245   | 6    | 0.3622         | 236    | 5    | 238   | 4    | 0.2821         | 229   | 4    | 229   | 12   | 0.5092         | 248   | 8    |
| IB                  | 38              | 2               | 38    | 1    | 0.8020         | 40     | 1    | 42    | 1    | 0.4034         | 34    | 1    | 40    | 6    | 0.6427         | 46    | 2    |
| IF                  | 24              | 3               | 27    | 2    | 0.9586         | 12     | 1    | 15    | 1    | 0.0978         | 24    | 2    | 26    | 4    | 0.7474         | 14    | 2    |
| HM                  | 374             | 5               | 406   | 7    | 0.2656         | 395    | 9    | 390   | 6    | 0.4171         | 402   | 6    | 375   | 17   | 0.0755         | 456   | 13   |
| HB                  | 115             | 3               | 118   | 3    | 0.2629         | 108    | 2    | 106   | 2    | 0.9535         | 118   | 2    | 110   | 4    | 0.0341         | 147   | 3    |
| HF                  | 3               | 1               | 4     | 1    | 0.4495         | 4      | 1    | 6     | 1    | 0.2816         | 3     | 0    | 1     | 1    | 0.2719         | 2     | 0    |

<sup>1</sup>TW – Termond White; NZWxFG – crossbreeds of New Zealand White and Flemish Giant; PW – Popielno White; FG – Flemish Giant. <sup>2</sup>SD – standard deviation. <sup>3</sup>BW12 – body weight at 12th week of age(g);SW- Slaughter weight (g); HCW – hot carcass weight (g); CCW – chilled carcass weight (g); DPH – warm dressing out percentage (%); DPC – cold dressing out percentage (%); FMB– meat and bones in fore part (g); FF - dissectible fat in fore part (g); IM - meat in intermediate part (g); IB - bones in intermediate part (g); IF - dissectible fat in intermediate part (g); HM - meat in hind part (g); HB - bones in hind part (g); HF - dissectible fat in hind part(g). <sup>a,b</sup>Values within a row and breeds with different superscripts differ significantly at  $P<0.003$

Table S6. Associations between polymorphism g.41592248A>C within *IGFBP4* and carcass traits

| Traits                         | TW <sup>1</sup>         |                 |                         |             | <i>p</i> -value | NZW×FG                   |             |                          |             | <i>p</i> -value | PW    |      |       |      | <i>p</i> -value | FG    |      |
|--------------------------------|-------------------------|-----------------|-------------------------|-------------|-----------------|--------------------------|-------------|--------------------------|-------------|-----------------|-------|------|-------|------|-----------------|-------|------|
|                                | AA                      |                 | AC                      |             |                 | AA                       |             | AC                       |             |                 | AA    |      | AC    |      |                 | AA    |      |
|                                | Means                   | SD <sup>2</sup> | Means                   | SD          |                 | Means                    | SD          | Means                    | SD          |                 | Means | SD   | Means | SD   |                 | Means | SD   |
| <i>m. biceps femoris</i>       |                         |                 |                         |             |                 |                          |             |                          |             |                 |       |      |       |      |                 |       |      |
| pH <sub>45</sub>               | 6.66                    | 0.07            | 6.63                    | 0.05        | 0.8286          | 6.74                     | 0.03        | 6.62                     | 0.02        | 0.1480          | 6.71  | 0.04 | 6.60  | 0.12 | 0.6560          | 6.66  | 0.05 |
| L* <sub>45</sub>               | 53.90                   | 0.60            | 52.21                   | 0.35        | 0.0296          | 57.23                    | 0.26        | 57.34                    | 0.18        | 0.530           | 50.84 | 0.35 | 50.72 | 1.19 | 0.2885          | 52.51 | 0.48 |
| a* <sub>45</sub>               | <b>4.28<sup>a</sup></b> | <b>0.26</b>     | <b>2.93<sup>b</sup></b> | <b>0.13</b> | <b>0.0029</b>   | 11.24                    | 0.19        | 11.25                    | 0.12        | 0.8620          | 3.05  | 0.15 | 2.25  | 0.27 | 0.6495          | 3.55  | 0.22 |
| b* <sub>45</sub>               | 0.69                    | 0.29            | 1.05                    | 0.24        | 0.5969          | 0.83                     | 0.19        | 1.09                     | 0.11        | 0.5076          | 0.28  | 0.22 | 1.13  | 0.55 | 0.2230          | 0.79  | 0.24 |
| pH <sub>24</sub>               | 6.08                    | 0.07            | 5.88                    | 0.03        | 0.0243          | 5.79                     | 0.03        | 5.74                     | 0.02        | 0.5803          | 5.96  | 0.03 | 6.00  | 0.10 | 0.1267          | 6.08  | 0.02 |
| L* <sub>24</sub>               | 55.02                   | 0.40            | 55.52                   | 0.31        | 0.8197          | 57.79                    | 0.26        | 57.99                    | 0.15        | 0.4470          | 56.39 | 0.27 | 55.00 | 0.58 | 0.1577          | 57.51 | 0.48 |
| a* <sub>24</sub>               | 4.94                    | 0.34            | 4.15                    | 0.17        | 0.1618          | 12.68                    | 0.22        | 12.54                    | 0.14        | 0.7100          | 4.01  | 0.17 | 3.15  | 0.32 | 0.4550          | 4.52  | 0.28 |
| b* <sub>24</sub>               | 4.46                    | 0.27            | 4.06                    | 0.25        | 0.7994          | 3.74                     | 0.15        | 3.33                     | 0.13        | 0.2431          | 4.16  | 0.16 | 3.37  | 0.24 | 0.4046          | 4.57  | 0.23 |
| <i>m. longissimus lumborum</i> |                         |                 |                         |             |                 |                          |             |                          |             |                 |       |      |       |      |                 |       |      |
| pH <sub>45</sub>               | 6.39                    | 0.20            | 6.73                    | 0.03        | 0.4266          | 6.72                     | 0.03        | 6.74                     | 0.02        | 0.0508          | 6.68  | 0.05 | 6.44  | 0.15 | 0.1704          | 6.81  | 0.04 |
| L* <sub>45</sub>               | 58.82                   | 0.62            | 59.60                   | 0.53        | 0.3940          | 61.11                    | 0.39        | 60.15                    | 0.24        | 0.0508          | 59.64 | 0.58 | 59.02 | 2.29 | 0.0657          | 62.66 | 0.74 |
| a* <sub>45</sub>               | 2.22                    | 0.46            | 0.48                    | 0.27        | 0.0852          | 8.09                     | 0.23        | 8.79                     | 0.16        | 0.0214          | 1.77  | 0.40 | -0.11 | 0.67 | 0.5748          | 2.23  | 0.56 |
| b* <sub>45</sub>               | -1.57                   | 0.64            | -2.58                   | 0.45        | 0.6808          | -2.67                    | 0.20        | -2.26                    | 0.13        | 0.0769          | -1.13 | 0.45 | -4.75 | 0.42 | 0.0123          | -1.55 | 0.64 |
| pH <sub>24</sub>               | 5.91                    | 0.04            | 5.77                    | 0.03        | 0.2690          | 5.64                     | 0.02        | 5.59                     | 0.01        | 0.5330          | 5.82  | 0.03 | 5.79  | 0.11 | 0.6866          | 6.01  | 0.04 |
| L* <sub>24</sub>               | 54.51                   | 0.48            | 56.38                   | 0.34        | 0.2106          | <b>57.26<sup>a</sup></b> | <b>0.31</b> | <b>56.16<sup>b</sup></b> | <b>0.21</b> | <b>0.0031</b>   | 56.55 | 0.30 | 55.06 | 0.88 | 0.0237          | 59.12 | 0.58 |
| a* <sub>24</sub>               | 7.43                    | 0.44            | 5.25                    | 0.21        | 0.0013          | 12.99                    | 0.26        | 13.18                    | 0.18        | 0.4487          | 5.49  | 0.25 | 5.22  | 0.70 | 0.5027          | 7.65  | 0.34 |
| b* <sub>24</sub>               | 4.89                    | 0.31            | 3.99                    | 0.29        | 0.0755          | 2.30                     | 0.24        | 1.77                     | 0.15        | 0.2459          | 3.47  | 0.21 | 3.39  | 0.70 | 0.6161          | 5.66  | 0.36 |
| <i>m. longissimus lumborum</i> |                         |                 |                         |             |                 |                          |             |                          |             |                 |       |      |       |      |                 |       |      |
| Shear force                    | 1.90                    | 0.11            | 2.01                    | 0.09        | 0.0167          | <b>4.26<sup>a</sup></b>  | <b>0.15</b> | <b>3.65<sup>b</sup></b>  | <b>0.10</b> | <b>0.0026</b>   | 1.73  | 0.07 | 1.89  | 0.16 | 0.4846          | 2.13  | 0.08 |
| Hardness                       | 13.76                   | 0.47            | 12.92                   | 0.49        | 0.1535          | 60.46                    | 2.44        | 57.19                    | 1.54        | 0.5238          | 10.50 | 0.36 | 12.11 | 1.08 | 0.9364          | 12.18 | 0.53 |
| Springiness                    | 0.47                    | 0.01            | 0.45                    | 0.01        | 0.3316          | 0.53                     | 0.01        | 0.52                     | 0.01        | 0.2735          | 0.47  | 0.01 | 0.49  | 0.02 | 0.8821          | 0.49  | 0.01 |
| Cohesivness                    | 0.43                    | 0.01            | 0.42                    | 0.00        | 0.4166          | 0.43                     | 0.01        | 0.41                     | 0.01        | 0.0213          | 0.43  | 0.00 | 0.44  | 0.01 | 0.4219          | 0.45  | 0.01 |
| Cheviness                      | 2.87                    | 0.15            | 2.54                    | 0.13        | 0.6688          | 14.99                    | 0.66        | 12.80                    | 0.41        | 0.0255          | 2.17  | 0.10 | 2.59  | 0.32 | 0.9700          | 2.76  | 0.18 |

<sup>1</sup>TW – Termond White; NZW×FG – crossbreeds of New Zealand White and Flemish Giant; PW – Popielno White; FG – Flemish Giant. <sup>2</sup>SD – standard deviation. <sup>a,b</sup>Values within a row and breeds

with different superscripts differ significantly at  $P < 0.003$

Table S7. Associations between polymorphism *g.158093018A>T* within *IGFBP5* and growth and slaughter traits

| Traits <sup>3</sup> | TW <sup>1</sup> |                 |       |      | <i>p</i> -value | NZWxFG |      |       |      | <i>p</i> -value | PW    |      | FG     |      |
|---------------------|-----------------|-----------------|-------|------|-----------------|--------|------|-------|------|-----------------|-------|------|--------|------|
|                     | AA              |                 | AT    |      |                 | AA     |      | AT    |      |                 | AA    |      | AA     |      |
|                     | Means           | SD <sup>2</sup> | Means | SD   |                 | Means  | SD   | Means | SD   |                 | Means | SD   | Means  | SD   |
| BW12                | 2704            | 50              | 2638  | 52   | 0.3359          | 2566   | 93   | 2674  | 33   | 0.2470          | 2831  | 37   | 3248   | 70   |
| SW                  | 2732            | 47              | 2705  | 52   | 0.7550          | 2582   | 101  | 2728  | 39   | 0.1650          | 2838  | 38   | 3348   | 72   |
| HCW                 | 1462            | 26              | 1420  | 29   | 0.3692          | 1319   | 59   | 1395  | 21   | 0.1806          | 1447  | 21   | 1699   | 44   |
| CCW                 | 1427            | 25              | 1369  | 29   | 0.2442          | 1271   | 55   | 1351  | 20   | 0.1506          | 1333  | 17   | 1637   | 42   |
| DPH                 | 53.51           | 0.23            | 52.49 | 0.37 | 0.0886          | 50.91  | 0.70 | 51.01 | 0.22 | 0.8850          | 50.96 | 0.21 | 50.441 | 0.40 |
| DPC                 | 51.83           | 0.22            | 50.55 | 0.34 | 0.0119          | 49.14  | 0.74 | 49.35 | 0.20 | 0.7268          | 48.43 | 0.25 | 48.768 | 0.46 |
| FMB                 | 567             | 10              | 556   | 11   | 0.5939          | 502    | 24   | 531   | 8    | 0.2432          | 584   | 9    | 709    | 18   |
| FF                  | 31              | 3               | 28    | 4    | 0.9778          | 9      | 2    | 11    | 1    | 0.5929          | 25    | 2    | 15     | 2    |
| IM                  | 245             | 6               | 225   | 6    | 0.0447          | 227    | 10   | 238   | 4    | 0.3339          | 227   | 4    | 248    | 8    |
| IB                  | 41              | 2               | 36    | 1    | 0.0593          | 41     | 2    | 42    | 1    | 0.7829          | 36    | 1    | 46     | 2    |
| IF                  | 25              | 2               | 27    | 3    | 0.4091          | 15     | 2    | 14    | 1    | 0.4691          | 25    | 1    | 14     | 2    |
| HM                  | 398             | 6               | 379   | 7    | 0.1088          | 365    | 16   | 397   | 6    | 0.0790          | 393   | 5    | 456    | 13   |
| HB                  | 117             | 3               | 114   | 3    | 0.6145          | 101    | 4    | 108   | 2    | 0.2165          | 116   | 1    | 147    | 3    |
| HF                  | 4               | 1               | 3     | 1    | 0.1494          | 6      | 1    | 5     | 1    | 0.5725          | 2     | 0    | 2      | 0    |

<sup>1</sup>TW – Termond White; NZWxFG – crossbreeds of New Zealand White and Flemish Giant; PW – Popielno White; FG – Flemish Giant. <sup>2</sup>SD – standard deviation. <sup>3</sup>BW12 – body weight at 12th week of age(g);SW- Slaughter weight (g); HCW – hot carcass weight (g); CCW – chilled carcass weight (g); DPH – warm dressing out percentage (%); DPC – cold dressing out percentage (%); FMB– meat and bones in fore part (g); FF - dissectible fat in fore part (g); IM - meat in intermediate part (g); IB - bones in intermediate part (g); IF - dissectible fat in intermediate part (g); HM - meat in hind part (g); HB - bones in hind part (g); HF - dissectible fat in hind part(g). <sup>a,b</sup>Values within a row and breeds with different superscripts differ significantly at  $P<0.003$

Table S8. Associations between polymorphism g.158093018A>T within *IGFBP5* and carcass traits

| Traits                         | TW <sup>1</sup>         |                 |                         |             | <i>p</i> -value  | NZW×FG                  |             |                         |             | <i>p</i> -value | PW    |      | FG    |      |
|--------------------------------|-------------------------|-----------------|-------------------------|-------------|------------------|-------------------------|-------------|-------------------------|-------------|-----------------|-------|------|-------|------|
|                                | AA                      |                 | AT                      |             |                  | AA                      |             | AT                      |             |                 | AA    |      | AA    |      |
|                                | Means                   | SD <sup>2</sup> | Means                   | SD          |                  | Means                   | SD          | Means                   | SD          |                 | Means | SD   | Means | SD   |
| <i>m. biceps femoris</i>       |                         |                 |                         |             |                  |                         |             |                         |             |                 |       |      |       |      |
| pH <sub>45</sub>               | 6.61                    | 0.05            | 6.64                    | 0.07        | 0.9608           | 6.58                    | 0.05        | 6.67                    | 0.02        | 0.1379          | 6.69  | 0.04 | 6.66  | 0.05 |
| L* <sub>45</sub>               | 52.88                   | 0.45            | 53.21                   | 0.53        | 0.7194           | 56.75                   | 0.44        | 57.48                   | 0.17        | 0.1328          | 50.83 | 0.34 | 52.51 | 0.48 |
| a* <sub>45</sub>               | <b>2.97<sup>a</sup></b> | <b>0.17</b>     | <b>4.14<sup>b</sup></b> | <b>0.24</b> | <b>0.0010</b>    | 11.74                   | 0.29        | 11.09                   | 0.11        | 0.0654          | 2.94  | 0.14 | 3.55  | 0.22 |
| b* <sub>45</sub>               | 0.56                    | 0.29            | 1.36                    | 0.24        | 0.0200           | 1.03                    | 0.33        | 1.00                    | 0.10        | 0.9894          | 0.40  | 0.20 | 0.79  | 0.24 |
| pH <sub>24</sub>               | <b>5.80<sup>a</sup></b> | <b>0.02</b>     | <b>6.11<sup>b</sup></b> | <b>0.06</b> | <b>&lt;.0001</b> | <b>5.64<sup>a</sup></b> | <b>0.03</b> | <b>5.77<sup>b</sup></b> | <b>0.02</b> | <b>0.003</b>    | 5.97  | 0.03 | 6.08  | 0.02 |
| L* <sub>24</sub>               | 55.13                   | 0.38            | 55.27                   | 0.30        | 0.4594           | 57.24                   | 0.36        | 58.07                   | 0.16        | 0.0546          | 56.09 | 0.25 | 57.51 | 0.48 |
| a* <sub>24</sub>               | 4.26                    | 0.23            | 4.74                    | 0.30        | 0.2370           | 13.36                   | 0.34        | 12.36                   | 0.13        | 0.0094          | 3.93  | 0.17 | 4.52  | 0.28 |
| b* <sub>24</sub>               | 4.39                    | 0.24            | 4.28                    | 0.28        | 0.3692           | 3.63                    | 0.34        | 3.39                    | 0.11        | 0.4835          | 4.05  | 0.15 | 4.57  | 0.23 |
| <i>m. longissimus lumborum</i> |                         |                 |                         |             |                  |                         |             |                         |             |                 |       |      |       |      |
| pH <sub>45</sub>               | 6.65                    | 0.03            | 6.64                    | 0.06        | 0.4999           | 6.78                    | 0.04        | 6.73                    | 0.02        | 0.4507          | 6.63  | 0.05 | 6.81  | 0.04 |
| L* <sub>45</sub>               | 59.47                   | 0.56            | 58.64                   | 0.56        | 0.4682           | 60.41                   | 0.60        | 60.71                   | 0.25        | 0.6749          | 59.63 | 0.60 | 62.66 | 0.74 |
| a* <sub>45</sub>               | 0.89                    | 0.38            | 1.47                    | 0.38        | 0.5636           | 8.47                    | 0.41        | 8.45                    | 0.15        | 0.9754          | 1.46  | 0.36 | 2.23  | 0.56 |
| b* <sub>45</sub>               | -2.06                   | 0.62            | -2.64                   | 0.48        | 0.2432           | -2.51                   | 0.45        | -2.43                   | 0.11        | 0.8716          | -1.76 | 0.41 | -1.55 | 0.64 |
| pH <sub>24</sub>               | <b>5.72<sup>a</sup></b> | <b>0.03</b>     | <b>5.91<sup>b</sup></b> | <b>0.03</b> | <b>0.0025</b>    | <b>5.52<sup>a</sup></b> | <b>0.04</b> | <b>5.62<sup>b</sup></b> | <b>0.01</b> | <b>0.0011</b>   | 5.81  | 0.03 | 6.01  | 0.04 |
| L* <sub>24</sub>               | 55.93                   | 0.37            | 55.02                   | 0.47        | 0.3436           | 55.36                   | 0.47        | 56.83                   | 0.21        | 0.0123          | 56.27 | 0.29 | 59.12 | 0.58 |
| a* <sub>24</sub>               | 5.24                    | 0.25            | 6.80                    | 0.45        | 0.0135           | 13.66                   | 0.43        | 12.87                   | 0.17        | 0.1063          | 5.49  | 0.23 | 7.65  | 0.34 |
| b* <sub>24</sub>               | 4.01                    | 0.32            | 4.41                    | 0.33        | 0.6883           | 1.44                    | 0.31        | 1.88                    | 0.15        | 0.2409          | 3.45  | 0.20 | 5.66  | 0.36 |
| <i>m. longissimus lumborum</i> |                         |                 |                         |             |                  |                         |             |                         |             |                 |       |      |       |      |
| Shear force                    | <b>2.25<sup>a</sup></b> | <b>0.10</b>     | <b>1.74<sup>b</sup></b> | <b>0.08</b> | <b>0.0005</b>    | 3.30                    | 0.21        | 3.95                    | 0.10        | 0.0192          | 1.77  | 0.07 | 2.13  | 0.08 |
| Hardness                       | 14.13                   | 0.63            | 12.70                   | 0.35        | 0.0252           | 54.08                   | 3.95        | 59.68                   | 1.47        | 0.1554          | 10.78 | 0.36 | 12.18 | 0.53 |
| Springiness                    | 0.44                    | 0.01            | 0.47                    | 0.01        | 0.0208           | 0.54                    | 0.02        | 0.51                    | 0.01        | 0.2095          | 0.47  | 0.00 | 0.49  | 0.01 |
| Cohesivness                    | 0.43                    | 0.00            | 0.43                    | 0.01        | 0.8135           | 0.42                    | 0.01        | 0.41                    | 0.01        | 0.5851          | 0.43  | 0.00 | 0.45  | 0.01 |
| Cheviness                      | 2.80                    | 0.17            | 2.62                    | 0.12        | 0.3610           | 13.43                   | 1.27        | 13.71                   | 0.39        | 0.7814          | 2.24  | 0.10 | 2.76  | 0.18 |

<sup>1</sup>TW – Termond White; NZWxFG – crossbreeds of New Zealand White and Flemish Giant; PW – Popielno White; FG – Flemish Giant. <sup>2</sup>SD – standard deviation. <sup>a,b</sup>Values within a row and breeds

with different superscripts differ significantly at  $P < 0.003$
